# Supplementary material
Source: Elsevier journal article supplement (https://openaccess.sgul.ac.uk/id/eprint/114346/11/mmc1.pdf)
Supplement: mmc1 [file mmc1.pdf]

**Supplementary Material**

Fig S1 Proportion of participants with 2,1 and 0 *APOL1* variants

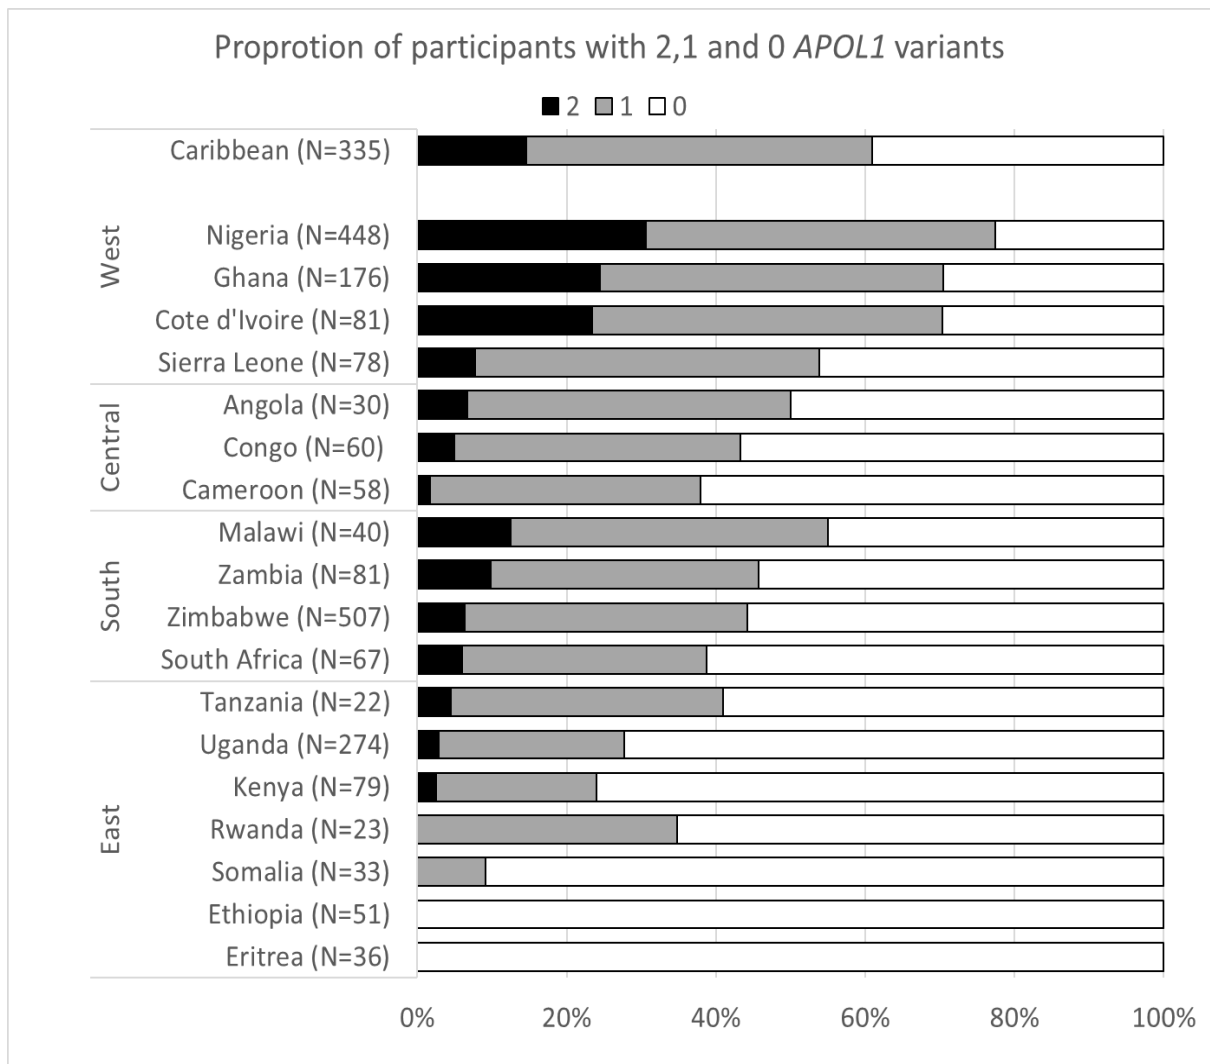

Fig S2 Proportion of biopsy-confirmed cases of HIVAN/FSGS by African region

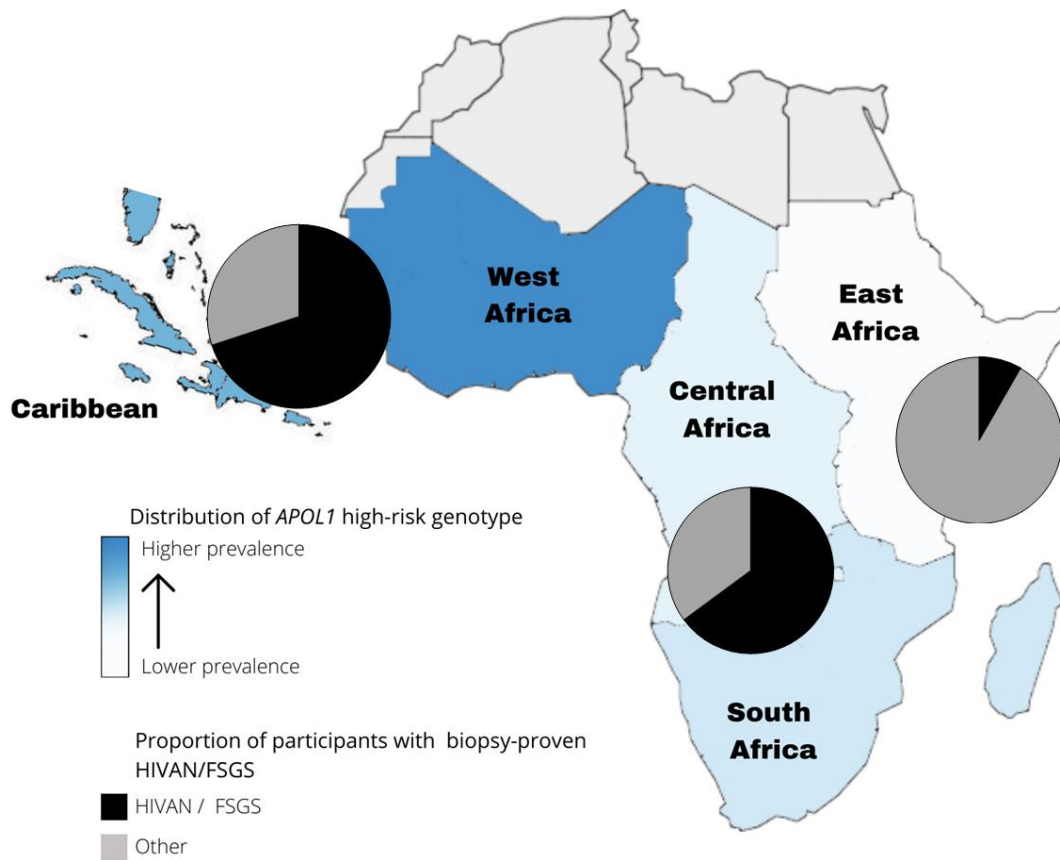

Distribution of *APOL1* genotype by African region

| African Region | n (%) | N   | <i>APOL1</i> genotype |           |
|----------------|-------|-----|-----------------------|-----------|
|                |       |     | Low-risk              | High-risk |
| East           | n (%) | 554 | 543 (98)              | 11 (2)    |
| South          | n (%) | 765 | 713 (93)              | 52 (7)    |
| Central        | n (%) | 157 | 148 (94)              | 9 (6)     |
| West           | n (%) | 859 | 640 (75)              | 219 (25)  |
| Caribbean      | n (%) | 347 | 297 (86)              | 50 (14)   |

Proportion of biopsy-confirmed HIVAN/FSGS by African region

| African Region | n (%) | N  | Kidney Pathology |         |
|----------------|-------|----|------------------|---------|
|                |       |    | HIVAN/FSGS       | Other   |
| East           | n (%) | 12 | 1 (8)            | 11 (92) |
| South/Central  | n (%) | 17 | 11 (65)          | 6 (35)  |
| West/Caribbean | n (%) | 53 | 37 (70)          | 16 (30) |

Table S1 Baseline characteristics of study participants stratified by end-stage kidney disease and by renal impairment

|                                              |           | Total         | ESKD*         | stage 1-4     | p-value | eGFR <60      | eGFR ≥60      | p-value |
|----------------------------------------------|-----------|---------------|---------------|---------------|---------|---------------|---------------|---------|
|                                              |           | N=2,864       | N=99          | N=2,765       |         | N=221         | N=2,643       |         |
| Number of <i>APOL1</i> variants              |           |               |               |               | <0.001  |               |               | <0.001  |
| 0                                            | n (%)     | 1,406 (49.1)  | 26 (26.3)     | 1,380 (49.9)  |         | 78 (35.3)     | 1,328 (50.2)  |         |
| 1                                            | n (%)     | 1,104 (38.5)  | 18 (18.2)     | 1,086 (39.3)  |         | 57 (25.8)     | 1,047 (39.6)  |         |
| 2                                            | n (%)     | 354 (12.4)    | 55 (55.6)     | 299 (10.8)    |         | 86 (38.9)     | 268 (10.1)    |         |
| Age, years                                   | mean (sd) | 48.1 (10.3)   | 50.6 (7.8)    | 48.0 (10.3)   | 0.013   | 53.9 (10.2)   | 47.6 (10.1)   | <0.001  |
| Sex, female                                  | n (%)     | 1,641 (57.3)  | 44 (44.4)     | 1,597 (57.8)  | 0.008   | 104 (47.1)    | 1,537 (58.2)  | <0.001  |
| Region of ancestry                           |           |               |               |               | <0.001  |               |               | <0.001  |
| East Africa                                  | n (%)     | 554 (19.3)    | 15 (15.2)     | 539 (19.5)    |         | 33 (14.9)     | 521 (19.7)    |         |
| South Africa                                 | n (%)     | 765 (26.7)    | 13 (13.1)     | 752 (27.2)    |         | 41 (18.6)     | 724 (27.4)    |         |
| Central Africa                               | n (%)     | 157 (5.5)     | 5 (5.1)       | 152 (5.5)     |         | 9 (4.1)       | 148 (5.6)     |         |
| West Africa                                  | n (%)     | 859 (30.0)    | 50 (50.5)     | 809 (29.3)    |         | 99 (44.8)     | 760 (28.8)    |         |
| Caribbean                                    | n (%)     | 347 (12.1)    | 13 (13.1)     | 334 (12.1)    |         | 33 (14.9)     | 314 (11.9)    |         |
| Other                                        | n (%)     | 182 (6.4)     | 3 (3.0)       | 179 (6.5)     |         | 6 (2.7)       | 176 (6.7)     |         |
| HIV mode of acquisition                      |           |               |               |               | <0.001  |               |               | 0.04    |
| Heterosexual                                 | n (%)     | 2,347 (81.9)  | 80 (80.8)     | 2,267 (82.0)  |         | 183 (82.8)    | 2,164 (81.9)  |         |
| MSM                                          | n (%)     | 74 (2.6)      | 2 (2.0)       | 72 (2.6)      |         | 6 (2.7)       | 68 (2.6)      |         |
| Vertical                                     | n (%)     | 232 (8.1)     | 1 (1.0)       | 231 (8.4)     |         | 8 (3.6)       | 224 (8.5)     |         |
| Blood products                               | n (%)     | 23 (0.8)      | 3 (3.0)       | 20 (0.7)      |         | 3 (1.4)       | 20 (0.8)      |         |
| Unknown                                      | n (%)     | 188 (6.6)     | 13 (13.1)     | 175 (6.3)     |         | 21 (9.5)      | 167 (6.3)     |         |
| Time since HIV diagnosis, years              | mean (sd) | 14.0 (6.5)    | 14.3 (6.8)    | 14.0 (6.5)    | 0.57    | 14.8 (6.8)    | 13.9 (6.4)    | 0.063   |
| Previous AIDS                                | n (%)     | 665 (24.0)    | 30 (31.6)     | 635 (23.7)    | 0.08    | 81 (37.7)     | 584 (22.8)    | <0.001  |
| Nadir CD4 cell count, cells/mm <sup>3</sup>  | mean (sd) | 200 (80-340)  | 136 (37-225)  | 205 (82-343)  | <0.001  | 119 (26-232)  | 210 (86-345)  | <0.001  |
| Recent CD4 cell count, cells/mm <sup>3</sup> | mean (sd) | 560 (403-735) | 350 (258-512) | 567 (411-740) | <0.001  | 443 (304-631) | 569 (412-743) | <0.001  |
| On antiretroviral therapy                    | n (%)     | 2,669 (93.2)  | 88 (88.9)     | 2,581 (93.3)  | 0.08    | 205 (92.8)    | 2,464 (93.2)  | 0.79    |
| HIV RNA <200 copies/mL                       |           | 2,832 (98.9)  | 98 (99.0)     | 2,734 (98.9)  | 0.92    | 218 (98.6)    | 2,614 (98.9)  | 0.72    |
| HBsAg positive                               | n (%)     | 159 (5.6)     | 8 (8.4)       | 151 (5.5)     | 0.23    | 15 (7.1)      | 144 (5.5)     | 0.34    |
| Anti-HCV positive                            | n (%)     | 35 (1.2)      | 5 (5.4)       | 30 (1.1)      | <0.001  | 8 (3.8)       | 27 (1.0)      | <0.001  |

|                             |       |              |           |              |        |            |              |        |
|-----------------------------|-------|--------------|-----------|--------------|--------|------------|--------------|--------|
| Diabetes                    | n (%) | 286 (10.1)   | 23 (23.2) | 263 (9.6)    | <0.001 | 56 (25.9)  | 230 (8.8)    | <0.001 |
| Hypertension                | n (%) | 915 (32.0)   | 94 (94.9) | 821 (29.7)   | <0.001 | 191 (86.4) | 724 (27.4)   | <0.001 |
| Cardiovascular disease†     | n (%) | 123 (4.3)    | 19 (19.2) | 104 (3.8)    | <0.001 | 33 (14.9)  | 90 (3.4)     | <0.001 |
| BMI, kg/m <sup>2</sup>      |       |              |           |              | 0.02   |            |              | 0.49   |
| <18.5                       | n (%) | 23 (0.8)     | 2 (2.1)   | 21 (0.8)     |        | 3 (1.4)    | 20 (0.8)     |        |
| 18.5-24.9                   | n (%) | 630 (22.4)   | 27 (28.7) | 603 (22.2)   |        | 52 (24.5)  | 578 (22.2)   |        |
| 25-29.9                     | n (%) | 1,016 (36.1) | 40 (42.6) | 976 (35.9)   |        | 79 (37.3)  | 937 (36.0)   |        |
| ≥30                         | n (%) | 1,146 (40.7) | 25 (26.6) | 1,121 (41.2) |        | 78 (36.8)  | 1,068 (41.0) |        |
| Smoking status              |       |              |           |              | 0.03   |            |              | 0.007  |
| Never                       | n (%) | 2,218 (77.4) | 72 (72.7) | 2,146 (77.6) |        | 170 (76.9) | 2,048 (77.5) |        |
| Ex                          | n (%) | 321 (11.2)   | 19 (19.2) | 302 (10.9)   |        | 36 (16.3)  | 285 (10.8)   |        |
| Current                     | n (%) | 325 (11.3)   | 8 (8.1)   | 317 (11.5)   |        | 15 (6.8)   | 310 (11.7)   |        |
| uPCR <sup>^</sup> , mg/mmol |       |              |           |              |        |            |              | <0.001 |
| <15                         | n (%) | 2,193 (79.3) |           |              |        | 92 (41.6)  | 2,149 (81.3) |        |
| 15-49                       | n (%) | 431 (15.6)   |           |              |        | 58 (26.2)  | 396 (15.0)   |        |
| 50-99                       | n (%) | 74 (2.7)     |           |              |        | 28 (12.7)  | 55 (2.1)     |        |
| ≥100                        | n (%) | 67 (2.4)     |           |              |        | 43 (19.5)  | 43 (1.6)     |        |
| uACR <sup>^</sup> , mg/mmol |       |              |           |              |        |            |              | <0.001 |
| <3                          | n (%) | 2,189 (82.2) |           |              |        | 48 (40.7)  | 2,141 (84.1) |        |
| 3-30                        | n (%) | 375 (14.1)   |           |              |        | 31 (26.3)  | 344 (13.5)   |        |
| >30                         | n (%) | 99 (3.7)     |           |              |        | 39 (33.1)  | 60 (2.4)     |        |

\*ESKD=eGFR <15mL/min/1.73m<sup>2</sup> and those on chronic dialysis or have had a kidney transplant

†Cardiovascular disease = composite of any previous history of myocardial infarction, coronary artery disease, peripheral vascular disease, stroke, heart failure and cardiomyopathy

<sup>^</sup> uPCR and uACR does not include participants with ESKD

ART=antiretroviral therapy; MSM=men who have sex with men; AIDS=acquired immunodeficiency syndrome; HBsAg=hepatitis B surface antigen; Anti-HCV=hepatitis C virus antibody; BMI=body mass index; uPCR=urine protein/creatinine ratio; uACR=urine albumin/creatinine ratio; ESKD=end-stage kidney disease; SD=standard deviation; IQR=interquartile range

Table S2 Univariate association between *APOL1* high-risk genotypes and hypertension

| Number of <i>APOL1</i> variants | eGFR strata |        | Univariate |              |         |
|---------------------------------|-------------|--------|------------|--------------|---------|
|                                 |             |        | OR         | 95% CI       | p value |
| 2 (vs 0/1)                      | eGFR>90     | N=1848 | 1.21       | 0.83 - 1.76  | 0.31    |
| 2 (vs 0/1)                      | eGFR 60-90  | N=795  | 1.63       | 1.08 - 2.46  | 0.02    |
| 2 (vs 0/1)                      | eGFR <60    | N=221  | 3.68       | 1.35 - 10.03 | 0.01    |

eGFR: estimated glomerular filtration rate in mL/min/1.73m<sup>2</sup>; OR = odds ratio; 95% CI = 95% confidence interval

Table S3 Associated between *APOL1* high-risk genotypes and kidney outcomes

Table S3A: Factors associated with ESKD (n = 99)

|                                                 | Univariate           |         | Adjusted for age, sex, ancestry |         | Additionally adjusted for HIV factors |         | Additionally adjusted for DM and CVD |         |
|-------------------------------------------------|----------------------|---------|---------------------------------|---------|---------------------------------------|---------|--------------------------------------|---------|
|                                                 | OR (95% CI)          | p value | OR (95% CI)                     | p value | OR (95% CI)                           | p value | OR (95% CI)                          | p value |
| Number of <i>APOL1</i> variants                 |                      |         |                                 |         |                                       |         |                                      |         |
| 0/1                                             | 1                    |         | 1                               |         | 1                                     |         | 1                                    |         |
| 2                                               | 10.31 (6.81 - 15.60) | <0.001  | 9.84 (6.18 - 15.67)             | <0.001  | 10.45 (6.21 - 17.61)                  |         | 10.58 (6.22 - 17.99)                 | <0.001  |
| Region of ancestry                              |                      | <0.001* |                                 | 0.32*   |                                       | 0.67*   |                                      | 0.72*   |
| East Africa                                     | 1                    |         | 1                               |         | 1                                     |         | 1                                    |         |
| South Africa                                    | 0.62 (0.29 - 1.32)   | 0.21    | 0.48 (0.22 - 1.04)              | 0.06    | 0.5 (0.22 - 1.14)                     | 0.10    | 0.52 (0.23 - 1.20)                   | 0.13    |
| Central Africa                                  | 1.18 (0.42 - 3.30)   | 0.75    | 0.96 (0.33 - 2.79)              | 0.95    | 0.68 (0.20 - 2.28)                    | 0.53    | 0.67 (0.19 - 2.35)                   | 0.53    |
| West Africa                                     | 2.22 (1.253 - 4.00)  | 0.008   | 0.87 (0.45 - 1.70)              | 0.70    | 0.76 (0.37 - 1.56)                    | 0.45    | 0.79 (0.38 - 1.67)                   | 0.54    |
| Caribbean                                       | 1.4 (0.66 - 2.98)    | 0.38    | 0.66 (0.29 - 1.49)              | 0.32    | 0.75 (0.31 - 1.78)                    | 0.51    | 0.84 (0.35 - 2.05)                   | 0.71    |
| Other                                           | 0.6 (0.17 - 2.10)    | 0.43    | 0.49 (0.14 - 1.77)              | 0.28    | 0.54 (0.14 - 2.02)                    | 0.36    | 0.58 (0.15 - 2.27)                   | 0.43    |
| Age (years)                                     |                      | 0.02*   |                                 | 0.04*   |                                       | 0.08*   |                                      | 0.33*   |
| <45                                             | 1                    |         | 1                               |         | 1                                     |         | 1                                    |         |
| 45-54.9                                         | 1.88 (1.13 - 3.12)   |         | 1.8 (1.07 - 3.05)               | 0.03    | 1.73 (0.96 - 3.10)                    | 0.07    | 1.58 (0.86 - 2.90)                   | 0.14    |
| >55                                             | 1.9 (1.09 - 3.30)    |         | 1.9 (1.06 - 3.42)               | 0.03    | 1.97 (1.04 - 3.76)                    | 0.04    | 1.4 (0.70 - 2.81)                    | 0.34    |
| Sex (female vs. male)                           | 0.58 (0.39 - 0.88)   | 0.009   | 0.68 (0.44 - 1.04)              | 0.07    | 0.89 (0.55 - 1.43)                    | 0.63    | 0.88 (0.54 - 1.43)                   | 0.61    |
| Time since HIV diagnosis (per 5-year increment) | 1.05 (0.90 - 1.22)   | 0.57    |                                 |         |                                       |         |                                      |         |
| Prior AIDS                                      | 1.49 (0.96 - 2.31)   | 0.08    |                                 |         | 1.43 (0.87 - 2.33)                    | 0.16    | 1.2 (0.72 - 2.00)                    | 0.49    |
| Recent CD4 cell count, cells/mm <sup>3</sup>    |                      | <0.001  |                                 |         |                                       | <0.001* |                                      | <0.001* |
| ≥500                                            | 1                    |         |                                 |         | 1                                     |         | 1                                    |         |
| 350-499                                         | 2.11 (1.19 - 3.75)   | 0.01    |                                 |         | 2.09 (1.11 - 3.93)                    | 0.02    | 2.25 (1.18 - 4.30)                   | 0.01    |
| <350                                            | 6.22 (3.87 - 10.01)  | <0.001  |                                 |         | 5.76 (3.32 - 10.00)                   | <0.001  | 6.22 (3.52 - 10.98)                  | <0.001  |
| On antiretroviral therapy                       | 1.11 (0.15 - 0.22)   | 0.92    |                                 |         |                                       |         |                                      |         |
| HIV viral load (<200 copies/mL)                 | 0.87 (0.30 - 1.09)   | 0.09    |                                 |         | 0.78 (0.38 - 1.60)                    | 0.50    | 0.81 (0.39 - 1.71)                   | 0.58    |

|                        |                        |        |                     |      |                     |        |
|------------------------|------------------------|--------|---------------------|------|---------------------|--------|
| HBsAg positive         | 1.57 (0.75 - 3.30)     | 0.23   |                     |      |                     |        |
| Anti-HCV positive      | 5.15 (1.95 - 13.59)    | 0.001  | 3.73 (1.13 - 12.60) | 0.03 | 3.01 (0.88 - 10.29) | 0.08   |
| Diabetes               | 2.85 (1.76 - 4.62)     | <0.001 |                     |      | 2.72 (1.44 - 5.12)  | 0.002  |
| Hypertension           | 44.45 (18.01 - 109.67) | <0.001 |                     |      |                     |        |
| Cardiovascular disease | 6.07 (3.55 - 10.39)    | <0.001 |                     |      | 5.9 (3.06 - 11.36)  | <0.001 |

ESKD = eGFR <15 mL/min/1.73m<sup>2</sup> and those on chronic dialysis or have had a kidney transplant

Table S3B: Factors associated with renal impairment (n = 221)

|                                                                            | Univariate         |         | Adjusted for age, sex, ancestry |         | Additionally adjusted for HIV factors |         | Additionally adjusted for DM and CVD |         |
|----------------------------------------------------------------------------|--------------------|---------|---------------------------------|---------|---------------------------------------|---------|--------------------------------------|---------|
|                                                                            | OR (95% CI)        | p value | OR (95% CI)                     | p value | OR (95% CI)                           | p value | OR (95% CI)                          | p value |
| <b>Factors associated with eGFR &lt;60mL/min/1.72m<sup>2</sup> (n=221)</b> |                    |         |                                 |         |                                       |         |                                      |         |
| Number of <i>APOL1</i> variants                                            |                    |         |                                 |         |                                       |         |                                      |         |
| 0/1                                                                        | 1                  |         | 1                               |         | 1                                     |         | 1                                    |         |
| 2                                                                          | 5.65 (4.19 - 7.61) | <0.001  | 5.3 (3.78 - 7.32)               | <0.001  | 5.1 (3.57 - 7.29)                     | <0.001  | 5.5 (3.81 - 7.95)                    | <0.001  |
| Region of ancestry                                                         |                    | <0.001* |                                 | 0.14*   |                                       | 0.02*   |                                      | 0.03*   |
| East Africa                                                                | 1                  |         | 1                               |         | 1                                     |         | 1                                    |         |
| South Africa                                                               | 0.89 (0.56 - 1.43) | 0.64    | 0.86 (0.53 - 1.40)              | 0.56    | 0.95 (0.56 - 1.59)                    | 0.83    | 0.93 (0.54 - 1.59)                   | 0.79    |
| Central Africa                                                             | 0.96 (0.45 - 2.05) | 0.92    | 0.93 (0.43 - 2.04)              | 0.86    | 0.91 (0.39 - 2.10)                    | 0.82    | 0.87 (0.37 - 2.11)                   | 0.79    |
| West Africa                                                                | 2.06 (1.37 - 3.10) | 0.001   | 1.35 (0.86 - 2.11)              | 0.24    | 1.84 (1.12 - 3.02)                    | 0.02    | 1.79 (1.07 - 3.00)                   | 0.03    |
| Caribbean                                                                  | 1.66 (1.00 - 2.74) | 0.05    | 1.06 (0.62 - 1.81)              | 0.83    | 1.5 (0.84 - 2.65)                     | 0.17    | 1.58 (0.88 - 2.84)                   | 0.13    |
| Other                                                                      | 0.54 (0.22 - 1.31) | 0.17    | 0.55 (0.22 - 1.37)              | 0.20    | 0.7 (0.27 - 1.82)                     | 0.46    | 0.73 (0.28 - 1.89)                   | 0.52    |
| Age (years)                                                                |                    | <0.001* |                                 | <0.001* |                                       | <0.001* |                                      | <0.001* |
| <45                                                                        | 1                  |         | 1                               |         | 1                                     |         | 1                                    |         |
| 45-54.9                                                                    | 2.09 (1.42 - 3.09) | <0.001  | 2.05 (1.37 - 3.06)              | <0.001  | 1.72 (1.11 - 2.64)                    | 0.01    | 1.58 (1.01 - 2.48)                   | 0.05    |
| >55                                                                        | 4 (2.72 - 5.89)    | <0.001  | 4.32 (2.87 - 6.49)              | <0.001  | 3.82 (2.47 - 5.91)                    | <0.001  | 2.85 (1.79 - 4.54)                   | <0.001  |
| Sex (female vs. male)                                                      | 0.64 (0.49 - 0.54) | 0.001   | 0.77 (0.57 - 1.04)              | 0.09    | 0.95 (0.69 - 1.30)                    | 0.74    | 0.95 (0.68 - 1.31)                   | 0.74    |
| Time since HIV diagnosis (per 5-year increment)                            | 1.1 (0.99 - 1.27)  | 0.06    |                                 |         | 1.21 (1.07 - 1.37)                    | 0.002   | 1.19 (1.05 - 1.35)                   | 0.006   |
| Prior AIDS                                                                 | 2.05 (1.53 - 2.74) | <0.001  |                                 |         | 2.06 (1.49 - 2.84)                    | <0.001  | 1.9 (1.36 - 2.64)                    | <0.001  |
| Recent CD4 cell count, cells/mm <sup>3</sup>                               |                    | <0.001* |                                 |         |                                       | <0.001* |                                      | <0.001* |
| ≥500                                                                       | 1                  |         |                                 |         | 1                                     |         | 1                                    |         |
| 350-499                                                                    | 1.55 (1.08 - 2.21) | 0.02    |                                 |         | 1.47 (0.99 - 2.17)                    | 0.06    | 1.63 (1.09 - 2.44)                   | 0.02    |
| <350                                                                       | 3.09 (2.25 - 4.25) | <0.001  |                                 |         | 2.91 (2.01 - 4.21)                    | <0.001  | 3.12 (2.13 - 4.57)                   | <0.001  |
| On antiretroviral therapy                                                  | 0.81 (0.24 - 2.67) | 0.72    |                                 |         |                                       |         |                                      |         |
| HIV viral load (<200 copies/mL)                                            | 0.93 (0.55 - 1.58) | 0.79    |                                 |         |                                       |         |                                      |         |
| HBsAg positive                                                             | 1.31 (0.75 - 2.27) | 0.34    |                                 |         |                                       |         |                                      |         |



|                        |                       |        |                    |      |                    |        |
|------------------------|-----------------------|--------|--------------------|------|--------------------|--------|
| Anti-HCV positive      | 3.75 (1.68 - 8.37)    | 0.001  | 2.83 (1.13 - 7.08) | 0.03 | 2.46 (0.95 - 6.37) | 0.07   |
| Diabetes               | 3.64 (2.61 - 5.08)    | <0.001 |                    |      | 2.89 (1.93 - 4.32) | <0.001 |
| Hypertension           | 16.85 (11.36 - 24.99) | <0.001 |                    |      |                    |        |
| Cardiovascular disease | 4.97 (3.25 - 7.61)    | <0.001 |                    |      | 3.69 (2.25 - 6.03) | <0.001 |

---

Renal impairment = eGFR<60mL/min/1.73m<sup>2</sup>

Table S3C: Factors associated with proteinuria (n=67^)

|                                                 | Univariate         |         |
|-------------------------------------------------|--------------------|---------|
|                                                 | OR (95% CI)        | p value |
| Number of <i>APOL1</i> variants                 |                    |         |
| 0/1                                             | 1                  |         |
| 2                                               | 1.83 (0.97 - 3.46) | 0.06    |
| Region of ancestry                              |                    | 0.73*   |
| East Africa                                     | 1                  |         |
| South Africa                                    | 1.28 (0.64 - 2.54) | 0.49    |
| Central Africa                                  | 0.54 (0.12 - 2.42) | 0.42    |
| West Africa                                     | 0.97 (0.48 - 1.99) | 0.94    |
| Caribbean                                       | 0.74 (0.28 - 1.97) | 0.55    |
| Other                                           | 0.92 (0.30 - 2.87) | 0.89    |
| Age (years)                                     |                    |         |
| <45                                             | 1                  |         |
| 45-54.9                                         | 1.37 (0.78 - 2.40) | 0.27    |
| >55                                             | 1.08 (0.55 - 2.10) | 0.83    |
| Sex (female vs. male)                           | 1.16 (0.70 - 1.90) | 0.57    |
| Time since HIV diagnosis (per 5 year increment) | 0.97 (0.80 - 1.17) | 0.76    |
| Prior AIDS                                      | 2.28 (1.39 - 3.76) | 0.001   |
| Recent CD4 cell count, cells/mm <sup>3</sup>    |                    | 0.003*  |
| >500                                            | 1                  |         |
| 350-499                                         | 0.41 (0.17 - 0.96) | 0.04    |
| <350                                            | 1.77 (1.03 - 3.05) | 0.04    |
| On antiretroviral therapy                       | -                  |         |
| HIV viral load (<200 copies/mL)                 | 1.53 (0.48 - 4.93) | 0.47    |
| HBsAg positive                                  | 0.26 (0.04 - 1.90) | 0.19    |

|                              |                    |        |
|------------------------------|--------------------|--------|
| Anti-HCV positive            | -                  |        |
| Diabetes                     | 4.55 (2.64 - 7.84) | <0.001 |
| Hypertension                 | 3.63 (2.21 - 5.96) | <0.001 |
| Prior cardiovascular disease | 3.67 (1.70 - 7.90) | 0.001  |

---

^does not include participants with ESKD (eGFR <15mL/min/1.73m<sup>2</sup> and those on chronic dialysis or have had a kidney transplant)

Proteinuria = urine protein creatinine ratio [PCR] >100mg/mmol

Table S3D: Factors associated with albuminuria (n=99^)

|                                                 | Univariate         |         | Adjusted for age, sex, ancestry |         | Additionally adjusted for HIV factors |         | Additionally adjusted for DM and CVD |         |
|-------------------------------------------------|--------------------|---------|---------------------------------|---------|---------------------------------------|---------|--------------------------------------|---------|
|                                                 | OR (95% CI)        | p value | OR (95% CI)                     | p value | OR (95% CI)                           | p value | OR (95% CI)                          | p value |
| Number of <i>APOL1</i> variants                 |                    |         |                                 |         |                                       |         |                                      |         |
| 0/1                                             | 1                  |         | 1                               |         | 1                                     |         | 1                                    |         |
| 2                                               | 2.57 (1.59 - 4.17) | <0.001  | 2.56 (1.58 - 4.16)              | <0.001  | 2.85 (1.74 - 4.67)                    | <0.001  | 3.34 (2.00 - 5.56)                   | <0.001  |
| Region of ancestry                              |                    | 0.21*   |                                 |         |                                       |         |                                      |         |
| East Africa                                     | 1                  |         |                                 |         |                                       |         |                                      |         |
| South Africa                                    | 1.2 (0.61 - 2.36)  | 0.59    |                                 |         |                                       |         |                                      |         |
| Central Africa                                  | 1.83 (0.72 - 4.62) | 0.2     |                                 |         |                                       |         |                                      |         |
| West Africa                                     | 1.95 (1.05 - 3.62) | 0.03    |                                 |         |                                       |         |                                      |         |
| Caribbean                                       | 1.17 (0.51 - 2.66) | 0.52    |                                 |         |                                       |         |                                      |         |
| Other                                           | 1.1 (0.39 - 3.06)  | 0.86    |                                 |         |                                       |         |                                      |         |
| Age (years)                                     |                    | 0.03*   |                                 | 0.03*   |                                       | 0.18*   |                                      | 0.65*   |
| <45                                             | 1                  |         | 1                               |         | 1                                     |         | 1                                    |         |
| 45-54.9                                         | 1.73 (1.04 - 2.87) | 0.03    | 1.69 (1.02 - 2.81)              | <0.001  | 1.41 (0.83 - 2.38)                    | 0.20    | 1.16 (0.67 - 2.00)                   | 0.61    |
| >55                                             | 1.97 (1.14 - 3.38) | 0.02    | 1.94 (1.13 - 3.34)              | <0.001  | 1.7 (0.96 - 2.99)                     | 0.07    | 0.94 (0.50 - 1.77)                   | 0.86    |
| Sex (female vs. male)                           | 0.77 (0.15 - 1.15) | 0.2     | 0.83 (0.55 - 1.25)              | 0.97    | 0.82 (0.54 - 1.25)                    | 0.36    | 0.85 (0.55 - 1.32)                   | 0.48    |
| Time since HIV diagnosis (per 5 year increment) | 1.16 (0.99 - 1.35) | 0.06    |                                 |         | 1.19 (1.02 - 1.39)                    | 0.03    | 1.2 (1.02 - 1.41)                    | 0.03    |
| Prior AIDS                                      | 1.98 (1.30 - 3.02) | 0.002   |                                 |         | 1.74 (1.13 - 2.68)                    | 0.01    | 1.69 (1.08 - 2.64)                   | 0.02    |
| Recent CD4 cell count, cells/mm <sup>3</sup>    |                    | 0.06*   |                                 |         |                                       | 0.26*   |                                      |         |
| >500                                            | 1                  |         |                                 |         | 1                                     |         | 1                                    |         |
| 350-499                                         | 1.07 (0.63 - 1.80) | 0.81    |                                 |         | 1.04 (0.61 - 1.78)                    | 0.87    | 1.21 (0.70 - 2.09)                   | 0.50    |
| <350                                            | 1.81 (1.12 - 2.94) | 0.02    |                                 |         | 1.7 (1.01 - 2.87)                     | 0.04    | 1.7 (0.98 - 2.95)                    | 0.06    |
| On antiretroviral therapy                       | 0.46 (0.11 - 1.97) | 0.29    |                                 |         |                                       |         |                                      |         |
| HIV viral load (<200 copies/mL)                 | 0.5 (0.27 - 0.92)  | 0.03    |                                 |         | 0.51 (0.27 - 0.99)                    | 0.05    | 0.71 (0.47 - 1.05)                   | 0.09    |
| HBsAg positive                                  | 0.52 (0.16 - 1.66) | 0.27    |                                 |         |                                       |         |                                      |         |
| Anti-HCV positive                               | -                  |         |                                 |         |                                       |         |                                      |         |

|                              |                    |        |                    |        |
|------------------------------|--------------------|--------|--------------------|--------|
| Diabetes                     | 5.62 (3.61 - 8.77) | <0.001 | 5.36 (3.24 - 8.86) | <0.001 |
| Hypertension                 | 6.09 (3.92 - 9.47) | <0.001 |                    |        |
| Prior cardiovascular disease | 3.69 (1.90 - 7.16) | <0.001 | 2.91 (1.39 - 6.09) | 0.005  |

---

^does not include participants with stage 5 CKD (eGFR <15mL/min/1.73m<sup>2</sup> and those on chronic dialysis or had a kidney transplant)

Albuminuria = urine albumin creatinine ratio [ACR] >30mg/mmol

Table S3E: Factors associated with clinical diagnosis of HIVAN/FSGS/hypertensive nephropathy, n=19

|                                                 | Univariate            |         | Adjusted for age, sex, ancestry |         | Additionally adjusted for HIV factors |         | Additionally adjusted for DM and CVD |         |
|-------------------------------------------------|-----------------------|---------|---------------------------------|---------|---------------------------------------|---------|--------------------------------------|---------|
|                                                 | OR (95% CI)           | p value | OR (95% CI)                     | p value | OR (95% CI)                           | p value | OR (95% CI)                          | p value |
| Number of <i>APOL1</i> variants                 |                       |         |                                 |         |                                       |         |                                      |         |
| 0/1                                             | 1                     | <0.001  | 1                               |         | 1                                     |         | 1                                    |         |
| 2                                               | 14.64 (5.46 - 39.27)  |         | 14.34 (5.33 - 38.55)            | <0.001  | 11.79 (4.18 - 33.30)                  | <0.001  | 12.77 (4.46 - 36.59)                 | <0.001  |
| Age (years)                                     |                       | 0.34*   |                                 | 0.41*   |                                       | 0.62*   |                                      | 0.61*   |
| <45                                             | 1                     | 0.17    | 1                               |         | 1                                     |         | 1                                    |         |
| 45-54.9                                         | 2.27 (0.71 - 7.25)    | 0.17    | 2.14 (0.66 - 6.91)              | 0.20    | 1.76 (0.51 - 6.14)                    | 0.37    | 1.58 (0.45 - 5.61)                   | 0.48    |
| >55                                             | 1.48 (0.71 - 7.25)    | 0.53    | 1.51 (0.37 - 6.16)              | 0.57    | 1.17 (0.25 - 5.51)                    | 0.85    | 0.87 (0.17 - 4.47)                   | 0.87    |
| Sex (female vs. male)                           | 0.74 (0.29 - 1.88)    |         | 0.87 (0.34 - 2.23)              | 0.77    | 1.68 (0.58 - 4.85)                    | 0.34    | 1.75 (0.60 - 5.09)                   | 0.31    |
| Recent CD4 cell count, cells/mm <sup>3</sup>    |                       | 0.002*  |                                 |         |                                       | 0.004*  |                                      | 0.003*  |
| ≥500                                            | 1                     | 0.06    |                                 |         | 1                                     |         | 1                                    |         |
| 350-499                                         | 3.48 (0.93 - 12.98)   | 0.001   |                                 |         | 3.33 (0.73 - 15.31)                   | 0.12    | 3.57 (0.78 - 16.53)                  | 0.1     |
| <350                                            | 7.49 (2.30 - 24.41)   |         |                                 |         | 8.48 (2.18 - 33.07)                   | 0.002   | 9.26 (2.33 - 36.81)                  | 0.002   |
| Time since HIV diagnosis (per 5 year increment) | 0.89 (0.62 - 1.29)    | 0.005   |                                 |         |                                       |         |                                      |         |
| Prior AIDS                                      | 4.12 (1.53 - 11.11)   |         |                                 |         |                                       |         | 3.43 (1.21 - 9.66)                   | 0.02    |
| On antiretroviral therapy                       | -                     | 0.11    |                                 |         |                                       |         |                                      |         |
| HIV viral load (<200 copies/mL)                 | 0.36 (0.10 - 1.26)    | 0.32    |                                 |         |                                       |         |                                      |         |
| HBsAg positive                                  | 2.11 (0.48 - 9.27)    | 0.13    |                                 |         |                                       |         |                                      |         |
| Anti-HCV positive                               | 4.77 (0.62 - 36.87)   |         |                                 |         | 2.63 (0.28 - 24.89)                   | 0.40    | 2.03 (0.21 - 19.72)                  | 0.54    |
| Diabetes                                        | 2.57 (0.84 - 7.87)    | <0.001  |                                 |         |                                       |         | 2.77 (0.66 - 11.53)                  | 0.16    |
| Hypertension                                    | 36.82 (4.89 - 277.10) | 0.79    |                                 |         |                                       |         |                                      |         |
| Prior cardiovascular disease                    | 1.31 (0.17 - 9.94)    |         |                                 |         |                                       |         | 0.71 (0.08 - 6.13)                   | 0.76    |

Table S3F: Factors associated with biopsy diagnosis of FSGS (excluding HIVAN), n=15

|                                                 | Univariate            |         | Adjusted for age, sex, ancestry |         | Additionally adjusted for HIV factors |         | Additionally adjusted for DM and CVD |         |
|-------------------------------------------------|-----------------------|---------|---------------------------------|---------|---------------------------------------|---------|--------------------------------------|---------|
|                                                 | OR (95% CI)           | p value | OR (95% CI)                     | p value | OR (95% CI)                           | p value | OR (95% CI)                          | p value |
| Number of <i>APOL1</i> variants                 |                       |         |                                 |         |                                       |         |                                      |         |
| 0/1                                             | 1                     |         | 1                               |         | 1                                     |         | 1                                    |         |
| 2                                               | 11.81 (4.17 - 33.39)  | <0.001  | 11.41 (4.02 - 32.43)            | <0.001  | 16.78 (5.38 - 52.39)                  | <0.001  | 16.84 (5.29 - 53.64)                 | <0.001  |
| Age (years)                                     |                       | 0.38*   |                                 | 0.47*   |                                       | 0.91*   |                                      | 0.98*   |
| <45                                             | 1                     |         | 1                               |         | 1                                     |         | 1                                    |         |
| 45-54.9                                         | 2.12 (0.55 - 8.24)    | 0.28    | 1.91 (0.49 - 7.49)              | 0.35    | 1.06 (0.25 - 4.54)                    | 0.94    | 0.93 (0.21 - 4.16)                   | 0.93    |
| >55                                             | 2.49 (0.59 - 10.45)   | 0.21    | 2.32 (0.54 - 9.89)              | 0.26    | 1.34 (0.29 - 6.23)                    | 0.71    | 0.85 (0.16 - 4.61)                   | 0.85    |
| Sex (female vs. male)                           | 0.27 (0.08 - 0.84)    | 0.02    | 0.31 (0.10 - 0.98)              | 0.05    | 0.36 (0.11 - 1.18)                    | 0.09    |                                      |         |
| Recent CD4 cell count, cells/mm <sup>3</sup>    |                       | 0.23*   |                                 |         |                                       |         |                                      |         |
| ≥500                                            | 1                     |         |                                 |         |                                       |         |                                      |         |
| 350-499                                         | 1.86 (0.52 - 6.61)    | 0.34    |                                 |         |                                       |         |                                      |         |
| <350                                            | 2.84 (0.86 - 9.33)    | 0.09    |                                 |         |                                       |         |                                      |         |
| Time since HIV diagnosis (per 5 year increment) | 1.59 (1.10 - 2.30)    | 0.02    |                                 |         | 1.65 (1.14 - 2.40)                    | 0.008   | 1.61 (1.11 - 2.36)                   | 0.01    |
| Prior AIDS                                      | 0.87 (0.24 - 3.14)    | 0.83    |                                 |         |                                       |         |                                      |         |
| On antiretroviral therapy                       | -                     |         |                                 |         |                                       |         |                                      |         |
| HIV viral load (<200 copies/mL)                 | 1.02 (0.13 - 7.80)    | 0.99    |                                 |         |                                       |         |                                      |         |
| HBsAg positive                                  | -                     |         |                                 |         |                                       |         |                                      |         |
| Anti-HCV positive                               | 6.56 (0.83 - 51.66)   | 0.07    |                                 |         | 7.27 (0.77 - 69.06)                   | 0.08    | 6.96 (0.74 - 65.36)                  | 0.09    |
| Diabetes                                        | 2.24 (0.63 - 7.98)    | 0.21    |                                 |         |                                       |         | 2.28 (0.53 - 9.79)                   | 0.27    |
| Hypertension                                    | 31.46 (4.13 - 239.65) | 0.001   |                                 |         |                                       |         |                                      |         |
| Prior cardiovascular disease                    | 8.68 (2.72 - 27.68)   | <0.001  |                                 |         |                                       |         | 6.7 (1.88 - 23.94)                   | 0.003   |

Table S3G: Factors associated with biopsy diagnosis of HIVAN (excluding FSGS), n=37

|                                                 | Univariate             |         | Adjusted for age, sex, ancestry |         | Additionally adjusted for HIV factors |         | Additionally adjusted for DM and CVD |         |
|-------------------------------------------------|------------------------|---------|---------------------------------|---------|---------------------------------------|---------|--------------------------------------|---------|
|                                                 | OR (95% CI)            | p value | OR (95% CI)                     | p value | OR (95% CI)                           | p value | OR (95% CI)                          | p value |
| Number of <i>APOL1</i> variants                 |                        |         |                                 |         |                                       |         |                                      |         |
| 0/1                                             | 1                      |         | 1                               |         | 1                                     |         | 1                                    |         |
| 2                                               | 24.49 (11.45 - 52.36)  | <0.001  | 24.26 (11.32 - 52.0)            | <0.001  | 30.89 (12.93 - 73.78)                 | <0.001  | 30.16 (12.48 - 72.88)                | <0.001  |
| Age (years)                                     |                        | 0.27*   |                                 | 0.31    |                                       | 0.17*   |                                      |         |
| <45                                             | 1                      |         | 1                               |         | 1                                     |         | 1                                    |         |
| 45-54.9                                         | 1.62 (0.71 - 3.68)     | 0.25    | 1.48 (0.64 - 3.42)              | 0.37    | 1.12 (0.43 - 2.94)                    | 0.81    | 1.29 (0.48 - 3.44)                   | 0.61    |
| >55                                             | 1.99 (0.83 - 4.75)     | 0.12    | 2.01 (0.82 - 4.93)              | 0.13    | 2.31 (0.88 - 6.09)                    | 0.09    | 2.68 (0.97 - 7.40)                   | 0.06    |
| Sex (female vs. male)                           | 0.5 (0.26 - 0.97)      | 0.04    | 0.59 (0.30 - 1.16)              | 0.12    | 0.65 (0.30 - 1.40)                    | 0.27    | 0.63 (0.29 - 1.40)                   | 0.06    |
| Recent CD4 cell count, cells/mm <sup>3</sup>    |                        | <0.001* |                                 |         |                                       | <0.001* |                                      | <0.001* |
| ≥500                                            | 1                      |         |                                 |         | 1                                     |         | 1                                    |         |
| 350-499                                         | 1.95 (0.74 - 5.15)     | 0.18    |                                 |         | 2.31 (0.81 - 6.61)                    | 0.12    | 2.18 (0.76 - 6.30)                   | 0.15    |
| <350                                            | 6.47 (2.99 - 13.99)    | <0.001  |                                 |         | 6.01 (2.44 - 14.81)                   | <0.001  | 5.24 (2.11 - 13.00)                  | <0.001  |
| Time since HIV diagnosis (per 5 year increment) | 1.07 (0.83 - 1.37)     | 0.60    |                                 |         |                                       |         |                                      |         |
| Prior AIDS                                      | 1.81 (0.91 - 3.59)     | 0.09    |                                 |         | 1.86 (0.86 - 4.00)                    | 0.12    | 1.83 (0.84 - 3.99)                   | 0.13    |
| On antiretroviral therapy                       | -                      |         |                                 |         |                                       |         |                                      |         |
| HIV viral load (<200 copies/mL)                 | 0.83 (0.25 - 2.71)     | 0.75    |                                 |         |                                       |         |                                      |         |
| HBsAg positive                                  | 2.18 (0.76 - 6.26)     | 0.15    |                                 |         |                                       |         |                                      |         |
| Anti-HCV positive                               | 5.33 (1.22 - 23.19)    | 0.03    |                                 |         | 4.25 (0.68 - 26.34)                   | 0.12    | 5.56 (0.90 - 34.31)                  | 0.07    |
| Diabetes                                        | 0.79 (0.24 - 2.59)     | 0.70    |                                 |         |                                       |         | 0.41 (0.08 - 2.02)                   | 0.27    |
| Hypertension                                    | 80.91 (11.07 - 591.05) | <0.001  |                                 |         |                                       |         |                                      |         |
| Prior cardiovascular disease                    | 4.62 (1.89 - 11.30)    | 0.001   |                                 |         |                                       |         | 3.52 (1.25 - 9.93)                   | 0.02    |
| BMI, kg/m <sup>2</sup>                          |                        | 0.21    |                                 |         |                                       |         |                                      |         |
| <18.5                                           | 2.32 (0.29 - 18.66)    | 0.43    |                                 |         |                                       |         |                                      |         |



|           |                    |      |
|-----------|--------------------|------|
| 18.5-24.9 | 1 ()               |      |
| 25-29.9   | 0.61 (0.27 - 1.38) | 0.24 |
| >30       | 0.45 (0.19 - 1.05) | 0.07 |

---

\*p values are from the likelihood ratio test

AIDS=acquired immunodeficiency syndrome; HBsAg=hepatitis B surface antigen; Anti-HCV=hepatitis C virus antibody; uPCR=urine protein/creatinine ratio; uACR=urine albumin/creatinine ratio; eGFR = estimated glomerular filtration rate; FSGS = focal segmental glomerulosclerosis; HIVAN = HIV associated nephropathy; OR = odds ratio; 95% CI = 95% confidence interval

Table S4 Associations between *APOL1* risk variants and ESKD/renal impairment.

| APOL1 variants                             | N  | Univariable |              |         | Multivariable* |              |         |
|--------------------------------------------|----|-------------|--------------|---------|----------------|--------------|---------|
|                                            |    | OR          | 95% CI       | p value | OR             | 95% CI       | p value |
| <b>ESKD<sup>x</sup></b>                    |    |             |              |         |                |              |         |
| G1G1 vs G0G0                               | 29 | 10.4        | 5.97 - 18.13 | <0.001  | 9.15           | 3.95 - 21.19 | <0.001  |
| G1G2 vs G0G0                               | 22 | 10.71       | 5.88 - 19.53 | <0.001  | 15.35          | 6.62 - 35.58 | <0.001  |
| G2G2 vs G0G0                               | 4  | 5.05        | 1.69 - 15.13 | 0.004   | 8.29           | 2.19 - 31.48 | 0.002   |
| G1G0 vs G0G0                               | 14 | 1.17        | 0.61 - 2.26  | 0.63    | 1.08           | 0.49 - 2.40  | 0.86    |
| G2G0 vs G0G0                               | 4  | 0.47        | 0.16 - 1.35  | 0.16    | 0.34           | 0.09 - 1.25  | 0.11    |
| G1G1 vs G2G2                               | 29 | 2.06        | 0.68 - 6.18  | 0.20    | 1.25           | 0.33 - 4.78  | 0.75    |
| G1G2 vs G2G2                               | 22 | 2.12        | 0.69 - 6.51  | 0.19    | 2.02           | 0.48 - 8.50  | 0.34    |
| G1G1 vs 0/1 variants                       | 29 | 10.98       | 6.68 - 18.06 | <0.001  | 8.75           | 4.52 - 16.94 | <0.001  |
| G1G2 vs 0/1 variants                       | 22 | 11.31       | 6.55 - 19.54 | <0.001  | 14.09          | 7.15 - 27.78 | <0.001  |
| G2G2 vs 0/1 variants                       | 4  | 5.33        | 1.83 - 15.53 | 0.002   | 4.85           | 2.09 - 11.22 | <0.001  |
| <b>eGFR &lt;60mL/min/1.73m<sup>2</sup></b> |    |             |              |         |                |              |         |
|                                            |    | OR          | 95% CI       | p value |                |              |         |
| G1G1 vs G0G0                               | 45 | 5.8         | 3.86 - 8.73  | <0.001  | 5.21           | 2.92 - 9.31  | <0.001  |
| G1G2 vs G0G0                               | 33 | 5.73        | 3.63 - 9.04  | <0.001  | 6.42           | 3.57 - 11.55 | <0.001  |
| G2G2 vs G0G0                               | 8  | 3.58        | 1.62 - 7.94  | 0.002   | 5.53           | 2.25 - 13.60 | <0.001  |
| G1G0 vs G0G0                               | 34 | 0.94        | 0.62 - 1.43  | 0.79    | 0.72           | 0.44 - 1.18  | 0.19    |
| G2G0 vs G0G0                               | 23 | 0.90        | 0.56 - 1.45  | 0.67    | 0.73           | 0.42 - 1.28  | 0.27    |
| G1G1 vs G2G2                               | 45 | 1.62        | 0.70 - 3.73  | 0.26    | 1.04           | 0.37 - 2.89  | 0.95    |
| G1G2 vs G2G2                               | 33 | 1.60        | 0.68 - 3.77  | 0.28    | 1.64           | 0.52 - 5.18  | 0.40    |
| G1G1 vs 0/1 variants                       | 45 | 6.00        | 4.10 - 8.77  | <0.001  | 5.13           | 3.18 - 8.28  | <0.001  |
| G1G2 vs 0/1 variants                       | 33 | 5.92        | 3.85 - 9.12  | <0.001  | 6.30           | 3.78 - 10.48 | <0.001  |
| G2G2 vs 0/1 variants                       | 8  | 3.70        | 1.69 - 8.09  | 0.001   | 7.18           | 2.19 - 23.52 | 0.001   |

<sup>x</sup>End-stage kidney disease (ESKD)=eGFR <15mL/min/1.73m<sup>2</sup> and those on chronic dialysis or have had a kidney transplant

\*Multivariable model for ESKD adjusted for age, sex, African region of ancestry, prior AIDS, current CD4 cell count, hepatitis C virus antibody, diabetes, and cardiovascular disease; multivariable model for eGFR<60ml/min/1.73m<sup>2</sup> adjusted for the same covariates including time since HIV diagnosis (per 5-year increment).

eGFR = estimated glomerular filtration rate; OR = odds ratio; 95% CI = 95% confidence interval

Table S5 Factors associated with *APOL1* high-risk genotypes and ESKD and renal impairment, inclusive of adjusting for hypertension

|                                                          | Univariable |              |         |             | Multivariable <sup>^</sup> |              |         |             |
|----------------------------------------------------------|-------------|--------------|---------|-------------|----------------------------|--------------|---------|-------------|
|                                                          | OR          | 95% CI       | p value | LRT p value | OR                         | 95% CI       | p value | LRT p value |
| <b>A. Factors associated with ESKD<sup>x</sup>, n=99</b> |             |              |         |             |                            |              |         |             |
| Number of <i>APOL1</i> variants                          |             |              |         |             |                            |              |         |             |
| 0/1                                                      | 1           |              |         |             | 1                          |              |         |             |
| 2                                                        | 10.31       | 6.81 - 15.60 | <0.001  |             | 7.32                       | 4.16 - 12.86 | <0.001  |             |
| Region of ancestry                                       |             |              |         |             |                            |              |         |             |
| East Africa                                              | 1           |              |         | <0.001      | 1                          |              |         | 0.68        |
| South Africa                                             | 0.62        | 0.29 - 1.32  | 0.21    |             | 0.5                        | 0.21 - 1.19  | 0.12    |             |
| Central Africa                                           | 1.18        | 0.42 - 3.30  | 0.75    |             | 0.54                       | 0.15 - 2.01  | 0.36    |             |
| West Africa                                              | 2.22        | 1.253 - 4.00 | 0.008   |             | 0.63                       | 0.29 - 1.37  | 0.25    |             |
| Caribbean                                                | 1.40        | 0.66 - 2.98  | 0.38    |             | 0.84                       | 0.33 - 2.13  | 0.72    |             |
| Other                                                    | 0.60        | 0.17 - 2.10  | 0.43    |             | 0.72                       | 0.17 - 3.04  | 0.66    |             |
| Age (years)                                              |             |              |         |             |                            |              |         |             |
| <45                                                      | 1           |              |         | 0.02        | 1                          |              |         | 0.07        |
| 45-54.9                                                  | 1.88        | 1.13 - 3.12  |         |             | 0.71                       | 0.36 - 1.40  | 0.32    |             |
| >55                                                      | 1.90        | 1.09 - 3.30  |         |             | 0.43                       | 0.20 - 0.91  | 0.03    |             |
| Sex (female vs. male)                                    |             |              |         |             |                            |              |         |             |
|                                                          | 0.58        | 0.39 - 0.88  | 0.009   |             | 0.85                       | 0.50 - 1.41  | 0.52    |             |
| Time since HIV diagnosis (per 5-year increment)          |             |              |         |             |                            |              |         |             |
| Prior AIDS                                               | 1.05        | 0.90 - 1.22  | 0.57    |             |                            |              |         |             |
|                                                          | 1.49        | 0.96 - 2.31  | 0.08    |             | 0.92                       | 0.53 - 1.59  | 0.76    |             |
| Recent CD4 cell count, cells/mm <sup>3</sup>             |             |              |         |             |                            |              |         |             |
| ≥500                                                     | 1           |              |         | <0.001      | 1                          |              |         | <0.001      |
| 350-499                                                  | 2.11        | 1.19 - 3.75  | 0.01    |             | 2.31                       | 1.18 - 4.51  | 0.01    |             |
| <350                                                     | 6.22        | 3.87 - 10.01 | <0.001  |             | 6.32                       | 3.47 - 11.51 | <0.001  |             |
| On antiretroviral therapy                                |             |              |         |             |                            |              |         |             |
|                                                          | 1.11        | 0.15 - 0.22  | 0.92    |             |                            |              |         |             |
| HIV viral load (<200 copies/mL)                          |             |              |         |             |                            |              |         |             |
|                                                          | 0.87        | 0.30 - 1.09  | 0.09    |             | 0.76                       | 0.34 - 1.73  | 0.52    |             |
| HBsAg positive                                           |             |              |         |             |                            |              |         |             |
|                                                          | 1.57        | 0.75 - 3.30  | 0.23    |             |                            |              |         |             |
| Anti-HCV positive                                        |             |              |         |             |                            |              |         |             |
|                                                          | 5.15        | 1.95 - 13.59 | 0.001   |             | 2.28                       | 0.59 - 8.83  | 0.23    |             |
| Diabetes                                                 |             |              |         |             |                            |              |         |             |
|                                                          | 2.85        | 1.76 - 4.62  | <0.001  |             | 1.88                       | 0.98 - 3.59  | 0.06    |             |

|                                                                                |       |                |        |        |       |               |        |        |
|--------------------------------------------------------------------------------|-------|----------------|--------|--------|-------|---------------|--------|--------|
| Hypertension                                                                   | 44.45 | 18.01 - 109.67 | <0.001 |        | 31.62 | 12.08 - 82.74 | <0.001 |        |
| Cardiovascular disease                                                         | 6.07  | 3.55 - 10.39   | <0.001 |        | 3.39  | 1.70 - 6.74   | 0.001  |        |
| <b>B. Factors associated with eGFR &lt;60 mL/min/1.73m<sup>2</sup> (n=221)</b> |       |                |        |        |       |               |        |        |
| Number of <i>APOL1</i> variants                                                |       |                |        | <0.001 |       |               |        |        |
| 0/1                                                                            | 1     |                |        |        | 1     |               |        |        |
| 2                                                                              | 5.65  | 4.19 - 7.61    | <0.001 |        | 4.05  | 2.74 - 5.98   | <0.001 |        |
| Region of ancestry                                                             |       |                |        | <0.001 |       |               |        | 0.08   |
| East Africa                                                                    | 1     |                |        |        | 1     |               |        |        |
| South Africa                                                                   | 0.89  | 0.56 - 1.43    | 0.64   |        | 0.93  | 0.54 - 1.62   | 0.81   |        |
| Central Africa                                                                 | 0.96  | 0.45 - 2.05    | 0.92   |        | 0.78  | 0.32 - 1.91   | 0.59   |        |
| West Africa                                                                    | 2.06  | 1.37 - 3.10    | 0.001  |        | 1.58  | 0.92 - 2.72   | 0.1    |        |
| Caribbean                                                                      | 1.66  | 1.00 - 2.74    | 0.05   |        | 1.84  | 0.99 - 3.38   | 0.05   |        |
| Other                                                                          | 0.54  | 0.22 - 1.31    | 0.17   |        | 0.88  | 0.32 - 2.37   | 0.8    |        |
| Age (years)                                                                    |       |                |        |        |       |               |        |        |
| <45                                                                            | 1     |                |        | <0.001 | 1     |               |        | 0.4    |
| 45-54.9                                                                        | 2.09  | 1.42 - 3.09    | <0.001 |        | 0.97  | 0.60 - 1.57   | 0.9    |        |
| >55                                                                            | 4.00  | 2.72 - 5.89    | <0.001 |        | 1.25  | 0.75 - 2.07   | 0.39   |        |
| Sex (female vs. male)                                                          | 0.64  | 0.49 - 0.54    | 0.001  |        |       |               |        |        |
| Time since HIV diagnosis (per 5-year increment)                                | 1.10  | 0.99 - 1.27    | 0.06   |        | 1.17  | 1.02 - 1.33   | 0.02   |        |
| Prior AIDS                                                                     | 2.05  | 1.53 - 2.74    | <0.001 |        | 1.74  | 1.22 - 2.46   | 0.002  |        |
| Recent CD4 cell count, cells/mm <sup>3</sup>                                   |       |                |        | <0.001 |       |               |        | <0.001 |
| ≥500                                                                           | 1     |                |        |        | 1     |               |        |        |
| 350-499                                                                        | 1.55  | 1.08 - 2.21    | 0.02   |        | 1.71  | 1.13 - 2.60   | 0.01   |        |
| <350                                                                           | 3.09  | 2.25 - 4.25    | <0.001 |        | 3.04  | 2.03 - 4.54   | <0.001 |        |
| On antiretroviral therapy                                                      | 0.81  | 0.24 - 2.67    | 0.72   |        |       |               |        |        |
| HIV viral load (<200 copies/mL)                                                | 0.93  | 0.55 - 1.58    | 0.79   |        |       |               |        |        |
| HBsAg positive                                                                 | 1.31  | 0.75 - 2.27    | 0.34   |        |       |               |        |        |
| Anti-HCV positive                                                              | 3.75  | 1.68 - 8.37    | 0.001  |        | 2.36  | 0.82 - 6.79   | 0.11   |        |
| Diabetes                                                                       | 3.64  | 2.61 - 5.08    | <0.001 |        | 1.99  | 1.31 - 3.02   | 0.001  |        |
| Hypertension                                                                   | 16.85 | 11.36 - 24.99  | <0.001 |        | 9.33  | 6.04 - 14.41  | <0.001 |        |
| Cardiovascular disease                                                         | 4.97  | 3.25 - 7.61    | <0.001 |        | 2.34  | 1.40 - 3.89   | 0.001  |        |

<sup>x</sup>ESKD=eGFR <15mL/min/1.73m<sup>2</sup> and those on chronic dialysis or had a kidney transplant

<sup>^</sup>Multivariable model adjusted for age, sex, African region of ancestry, time since HIV diagnosis (per 5-year increment), prior AIDS, current CD4 cell count, hepatitis C virus antibody, diabetes, cardiovascular disease, and hypertension

eGFR = estimated glomerular filtration rate; OR = odds ratio; 95% CI = 95% confidence interval

Table S6 Factors associated with *APOL1* high-risk genotypes and ESKD and renal impairment, without correction factor for ethnicity in estimated GFR

|                                                           | Univariate          |         | Adjusted for age, sex, ancestry |         | Additionally adjusted for HIV factors |         | Additionally adjusted for DM and CVD |         |
|-----------------------------------------------------------|---------------------|---------|---------------------------------|---------|---------------------------------------|---------|--------------------------------------|---------|
|                                                           | OR (95% CI)         | p value | OR (95% CI)                     | p value | OR (95% CI)                           | p value | OR (95% CI)                          | p value |
| <b>A. Factors associated with ESKD<sup>x</sup>, n=102</b> |                     |         |                                 |         |                                       |         |                                      |         |
| Number of <i>APOL1</i> variants                           |                     |         |                                 |         |                                       |         |                                      |         |
| 0/1                                                       | 1                   |         | 1                               |         | 1                                     |         | 1                                    |         |
| 2                                                         | 9.64 (6.41 - 14.49) | <0.001  | 9.23 (5.84 - 14.58)             | <0.001  | 9.56 (5.75 - 15.91)                   | <0.001  | 9.75 (5.80 - 16.39)                  | <0.001  |
| Region of ancestry                                        |                     | 0.0003  |                                 | 0.32    |                                       | 0.67    |                                      | 0.72    |
| East Africa                                               | 1                   |         | 1                               |         | 1                                     |         | 1                                    |         |
| South Africa                                              | 0.63 (0.30 - 1.30)  | 0.21    | 0.50 (0.23 - 1.05)              | 0.07    | 0.52 (0.24 - 1.14)                    | 0.10    | 0.54 (0.24 - 1.20)                   | 0.13    |
| Central Africa                                            | 1.11 (0.40 - 3.07)  | 0.85    | 0.91 (0.32 - 2.60)              | 0.86    | 0.65 (0.20 - 2.14)                    | 0.48    | 0.63 (0.18 - 2.18)                   | 0.46    |
| West Africa                                               | 2.12 (1.20 - 3.76)  | 0.01    | 0.86 (0.45 - 1.65)              | 0.66    | 0.76 (0.38 - 1.53)                    | 0.44    | 0.79 (0.39 - 1.63)                   | 0.52    |
| Caribbean                                                 | 1.301 (0.62 - 2.76) | 0.48    | 0.63 (0.28 - 1.40)              | 0.26    | 0.71 (0.30 - 1.66)                    | 0.43    | 0.80 (0.33 - 1.90)                   | 0.61    |
| Other                                                     | 0.56 (0.16 - 1.96)  | 0.37    | 0.46 (0.13 - 1.64)              | 0.23    | 0.51 (0.14 - 1.88)                    | 0.31    | 0.55 (0.14 - 2.11)                   | 0.39    |
| Age (years)                                               |                     | 0.02    |                                 | 0.05    |                                       | 0.09    |                                      |         |
| <45                                                       | 1                   |         | 1                               |         | 1                                     |         | 1                                    | 0.39    |
| 45-54.9                                                   | 1.85 (1.12 - 3.03)  | 0.02    | 1.75 (1.05 - 2.94)              | 0.03    | 1.67 (0.95 - 2.96)                    | 0.08    | 1.50 (0.83 - 2.72)                   | 0.18    |
| >55                                                       | 1.88 (1.09 - 3.25)  | 0.02    | 1.87 (1.06 - 3.33)              | 0.03    | 1.92 (1.03 - 3.60)                    | 0.04    | 1.32 (0.67 - 2.61)                   | 0.42    |
| Sex (female vs. male)                                     | 0.58 (0.39 - 0.86)  | 0.007   | 0.66 (0.43 - 1.00)              | 0.05    | 0.85 (0.53 - 1.35)                    | 0.49    | 0.84 (0.52 - 1.36)                   | 0.48    |
| Time since HIV diagnosis (per 5 year increment)           | 1.05 (0.91 - 1.23)  | 0.49    |                                 |         |                                       |         |                                      |         |
| Prior AIDS                                                | 1.49 (0.96 - 2.31)  | 0.08    |                                 |         | 1.43 (0.88 - 2.31)                    | 0.15    | 1.20 (0.73 - 1.98)                   | 0.48    |
| Recent CD4 cell count, cells/mm <sup>3</sup>              |                     | <0.001  |                                 |         |                                       | <0.001  |                                      | <0.001  |
| ≥500                                                      | 1                   |         |                                 |         | 1                                     |         | 1                                    |         |
| 350-499                                                   | 1.90 (1.09 - 3.34)  | 0.03    |                                 |         | 1.84 (0.99 - 3.41)                    | 0.05    | 2.00 (1.07 - 3.75)                   | 0.03    |
| <350                                                      | 5.61 (3.54 - 8.91)  | <0.001  |                                 |         | 5.02 (2.95 - 8.55)                    | <0.001  | 5.45 (3.15 - 9.43)                   | <0.001  |
| On antiretroviral therapy                                 | 1.15 (0.15 - 8.48)  | 0.89    |                                 |         |                                       |         |                                      |         |
| HIV viral load (<200 copies/mL)                           | 0.59 (0.31 - 1.12)  | 0.11    |                                 |         | 0.79 (0.39 - 1.61)                    | 0.52    | 0.83 (0.40 - 1.74)                   | 0.62    |

|                        |                        |        |                     |      |                     |        |
|------------------------|------------------------|--------|---------------------|------|---------------------|--------|
| HBsAg positive         | 1.57 (0.75 - 3.30)     | 0.23   |                     |      |                     |        |
| Anti-HCV positive      | 5.15 (1.95 - 13.59)    | 0.001  | 3.67 (1.14 - 11.88) | 0.03 | 2.92 (0.87 - 9.85)  | 0.08   |
| Diabetes               | 2.85 (1.76 - 4.62)     | <0.001 |                     |      | 3.01 (1.64 - 5.52)  | <0.001 |
| Hypertension           | 44.45 (18.01 - 109.67) | <0.001 |                     |      |                     |        |
| Cardiovascular disease | 6.07 (3.55 - 10.39)    | <0.001 |                     |      | 5.56 (2.91 - 10.61) | <0.001 |

---

Table S6 Factors associated with *APOL1* high-risk genotypes and ESKD and renal impairment, without correction factor for ethnicity in estimated GFR

|                                                                                          | Univariate         |        | Adjusted for age, sex, ancestry |        | Additionally adjusted for HIV factors |        | Additionally adjusted for DM and CVD |        |
|------------------------------------------------------------------------------------------|--------------------|--------|---------------------------------|--------|---------------------------------------|--------|--------------------------------------|--------|
| <b>B. Factors associated with renal impairment &lt;60mL/min/1.72m<sup>2</sup>, n=345</b> |                    |        |                                 |        |                                       |        |                                      |        |
| Number of <i>APOL1</i> variants                                                          |                    |        |                                 |        |                                       |        |                                      |        |
| 0/1                                                                                      | 1                  |        | 1                               |        | 1                                     |        | 1                                    |        |
| 2                                                                                        | 4.29 (3.30 - 5.57) | <0.001 | 4.15 (3.09 - 5.57)              | <0.001 | 4.07 (2.94 - 5.46)                    | <0.001 | 4.18 (3.05 - 5.73)                   | <0.001 |
| Region of ancestry                                                                       |                    | <0.001 |                                 | 0.05   |                                       | 0.02   |                                      | 0.02   |
| East Africa                                                                              | 1                  |        | 1                               |        | 1                                     |        | 1                                    |        |
| South Africa                                                                             | 1.13 (0.77 - 1.65) | 0.53   | 1.17 (0.79 - 1.74)              | 0.43   | 1.15 (0.76 - 1.73)                    | 0.52   | 1.17 (0.77 - 1.77)                   | 0.47   |
| Central Africa                                                                           | 1.11 (0.61 - 2.05) | 0.73   | 1.16 (0.61 - 2.19)              | 0.65   | 1.15 (0.59 - 2.23)                    | 0.68   | 1.12 (0.57 - 2.20)                   | 0.75   |
| West Africa                                                                              | 2.05 (1.45 - 2.90) | <0.001 | 1.62 (1.11 - 2.37)              | 0.01   | 1.75 (1.18 - 2.59)                    | 0.006  | 1.73 (1.16 - 2.59)                   | 0.01   |
| Caribbean                                                                                | 2.07 (1.37 - 2.12) | <0.001 | 1.45 (0.94 - 2.25)              | 0.09   | 1.69 (1.08 - 2.66)                    | 0.02   | 1.75 (1.11 - 2.78)                   | 0.02   |
| Other                                                                                    | 0.68 (0.34 - 1.34) | 0.26   | 0.76 (0.38 - 1.52)              | 0.43   | 0.86 (0.42 - 1.76)                    | 0.69   | 0.85 (0.40 - 1.79)                   | 0.67   |
| Age (years)                                                                              |                    | <0.001 |                                 | <0.001 |                                       | <0.001 |                                      | <0.001 |
| <45                                                                                      | 1                  |        | 1                               |        | 1                                     |        | 1                                    |        |
| 45-54.9                                                                                  | 2.88 (2.04 - 4.05) | <0.001 | 2.85 (2.00 - 4.05)              | <0.001 | 2.75 (1.90 - 3.98)                    | <0.001 | 2.63 (1.80 - 3.83)                   | <0.001 |
| >55                                                                                      | 6.22 (4.42 - 8.75) | <0.001 | 6.76 (4.73 - 9.67)              | <0.001 | 6.92 (4.77 - 10.06)                   | <0.001 | 5.74 (3.89 - 8.46)                   | <0.001 |
| Sex (female vs. male)                                                                    | 0.59 (0.47 - 0.74) | <0.001 | 0.72 (0.56 - 0.92)              | 0.009  | 0.81 (0.62 - 1.05)                    | 0.10   | 0.80 (0.62 - 1.05)                   | 0.10   |
| Time since HIV diagnosis (per 5 year increment)                                          | 1.06 (0.97 - 1.16) | 0.17   |                                 |        |                                       |        |                                      |        |
| Prior AIDS                                                                               | 1.82 (1.43 - 2.33) | <0.001 |                                 |        | 1.81 (1.38 - 2.36)                    | <0.001 | 1.66 (1.26 - 2.19)                   | <0.001 |
| Recent CD4 cell count, cells/mm <sup>3</sup>                                             |                    | <0.001 |                                 |        |                                       | 0.002  |                                      | 0.001  |
| ≥500                                                                                     | 1                  |        |                                 |        | 1                                     |        | 1                                    |        |
| 350-499                                                                                  | 1.29 (0.96 - 1.71) | 0.09   |                                 |        | 1.08 (0.79 - 1.48)                    | 0.65   | 1.15 (0.83 - 1.58)                   | 0.40   |
| <350                                                                                     | 2.18 (1.66 - 2.85) | <0.001 |                                 |        | 1.75 (1.28 - 2.39)                    | <0.001 | 1.84 (1.34 - 2.52)                   | <0.001 |
| On antiretroviral therapy                                                                | 0.74 (0.28 - 1.93) | 0.53   |                                 |        |                                       |        |                                      |        |
| HIV viral load (<200 copies/mL)                                                          | 0.84 (0.55 - 1.28) | 0.42   |                                 |        | 0.92 (0.57 - 1.47)                    | 0.72   | 0.92 (0.57 - 1.50)                   | <0.001 |

OR



|                        |                    |        |                    |      |                    |        |
|------------------------|--------------------|--------|--------------------|------|--------------------|--------|
| HBsAg positive         | 1.57 (1.02 - 2.41) | 0.04   |                    |      |                    |        |
| Anti-HCV positive      | 2.22 (1.00 - 4.94) | 0.05   | 1.55 (0.64 - 2.74) | 0.33 | 1.37 (0.55 - 3.41) | 0.49   |
| Diabetes               | 3.15 (2.35 - 4.22) | <0.001 |                    |      | 2.08 (1.48 - 2.93) | <0.001 |
| Hypertension           | 7.45 (5.78 - 9.59) | <0.001 |                    |      |                    |        |
| Cardiovascular disease | 4.00 (2.70 - 5.94) | <0.001 |                    |      | 2.94 (1.89 - 4.57) | <0.001 |

<sup>x</sup>ESKD=eGFR <15mL/min/1.73m<sup>2</sup> and those on chronic dialysis or had a kidney transplant  
eGFR = estimated glomerular filtration rate; OR = odds ratio; 95% CI = 95% confidence interval

**Table S7 Number and proportion of participants stratified by region of ancestry and APOL1 genotype**

**A. All participants**

|                    |       | G0/G0      | G1/G0      | G2/G0      | G1/G1      | G1/G2     | G2/G2     | Total |
|--------------------|-------|------------|------------|------------|------------|-----------|-----------|-------|
|                    |       | N=1,314    | N=600      | N=427      | N=171      | N=125     | N=45      |       |
| Region of ancestry |       |            |            |            |            |           |           |       |
| East               | n (%) | 432 (32.9) | 50 (8.3)   | 61 (14.3)  | 1 (0.6)    | 6 (4.8)   | 4 (8.9)   | 554   |
| South              | n (%) | 421 (32.0) | 120 (20.0) | 172 (40.3) | 13 (7.6)   | 25 (20.0) | 14 (31.1) | 765   |
| Central            | n (%) | 90 (6.8)   | 34 (5.7)   | 24 (5.6)   | 5 (2.9)    | 3 (2.4)   | 1 (2.2)   | 157   |
| West               | n (%) | 237 (18.0) | 287 (47.8) | 116 (27.2) | 128 (74.9) | 72 (57.6) | 19 (42.2) | 859   |
| Caribbean          | n (%) | 134 (10.2) | 109 (18.2) | 54 (12.6)  | 24 (14.0)  | 19 (15.2) | 7 (15.6)  | 347   |

**B. Participants with end-stage kidney disease**

|                    |       | G0/G0   | G1/G0  | G2/G0 | G1/G1   | G1/G2   | G2/G2  | Total |
|--------------------|-------|---------|--------|-------|---------|---------|--------|-------|
|                    |       | N=25    | N=13   | N=4   | N=29    | N=21    | N=4    |       |
| Region of ancestry |       |         |        |       |         |         |        |       |
| East               | n (%) | 12 (80) | 1 (7)  | 0 (0) | 0 (0)   | 1 (7)   | 1 (7)  | 15    |
| South              | n (%) | 6 (46)  | 2 (15) | 1 (8) | 0 (0)   | 2 (15)  | 2 (15) | 13    |
| Central            | n (%) | 2 (40)  | 1 (20) | 0 (0) | 1 (20)  | 1 (20)  | 0 (0)  | 5     |
| West               | n (%) | 3 (6)   | 7 (14) | 3 (6) | 23 (46) | 13 (26) | 1 (2)  | 50    |
| Caribbean          | n (%) | 2 (15)  | 2 (15) | 0 (0) | 5 (38)  | 4 (31)  | 0 (0)  | 13    |
